# Supplementary material for: Plant species' origin predicts dominance and response to nutrient enrichment and herbivores in global grasslands
Source: PubMed Central journal article supplement (PMC4518311; doi:10.1038/ncomms8710), 2015-07-15
Supplement: ncomms8710-s1.pdf [file ncomms8710-s1.pdf]

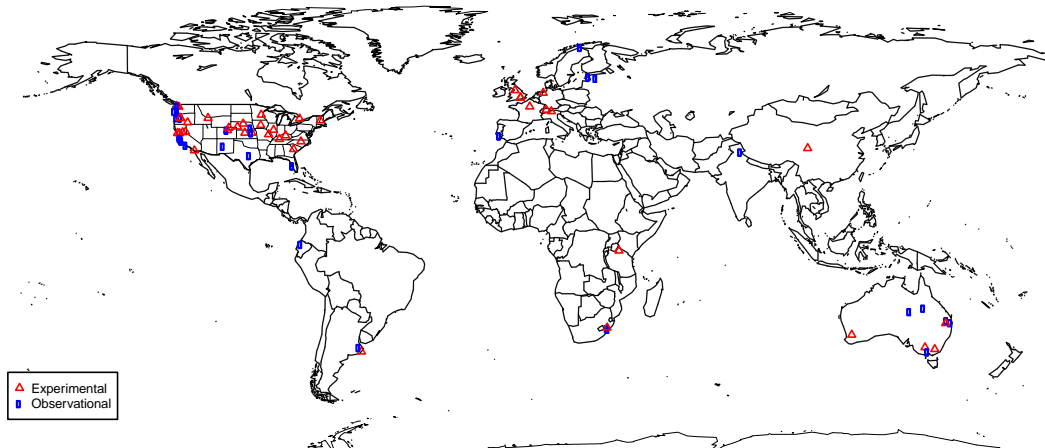

**Supplementary Figure 1.** Nutrient Network sites included in the current study.

**Supplementary Table 1:** Study sites included in analyses. Pretreatment observational data were collected at all sites. Subsequent fertilization and fencing were only conducted at experimental sites. Note that we only analyze experimental data from sites sampled for the first time before 2010.

| ID | Site Name             | Continent | Country      | Ecosystem Type     | Latitude | Longitude | Elevation (m) | Annual Precipitation (mm) | Study Type    | Number Plots | First Sample Year | Site Species Richness | % Introduced Species |
|----|-----------------------|-----------|--------------|--------------------|----------|-----------|---------------|---------------------------|---------------|--------------|-------------------|-----------------------|----------------------|
| 1  | Serengeti             | Africa    | Tanzania     | Savanna            | -2.25    | 34.51     | 1536          | 854                       | Experimental  | 30           | 2008              | 46                    | 0                    |
| 2  | Mt Gilboa             | Africa    | South Africa | Montane grassland  | -29.28   | 30.29     | 1748          | 926                       | Experimental  | 30           | 2009              | 65                    | 0                    |
| 3  | Summerveld            | Africa    | South Africa | Mesic grassland    | -29.81   | 30.72     | 679           | 939                       | Experimental  | 30           | 2009              | 94                    | 0                    |
| 4  | Ukulinga              | Africa    | South Africa | Mesic grassland    | -29.67   | 30.4      | 842.5         | 880                       | Experimental  | 30           | 2009              | 93                    | 2                    |
| 5  | Azi                   | Asia      | China        | Alpine grassland   | 33.67    | 101.87    | 3500          | 667                       | Experimental  | 30           | 2007              | 65                    | 0                    |
| 6  | Kibber (Spiti)        | Asia      | India        | Alpine grassland   | 32.32    | 78.01     | 4241          | 504                       | Experimental  | 30           | 2011              | 23                    | 0                    |
| 7  | Bogong                | Australia | Australia    | Alpine grassland   | -36.87   | 147.25    | 1760          | 1592                      | Experimental  | 30           | 2009              | 34                    | 6                    |
| 8  | Bunya Mountains       | Australia | Australia    | Grassland          | -26.89   | 151.61    | 0             | 871                       | Observational | 30           | 2013              | 17                    | 18                   |
| 9  | Burrawan              | Australia | Australia    | Semiarid grassland | -27.73   | 151.14    | 425           | 683                       | Experimental  | 30           | 2008              | 36                    | 14                   |
| 10 | Derrimut              | Australia | Australia    | Semiarid grassland | -37.81   | 144.79    | 38            | 574                       | Observational | 30           | 2007              | 19                    | 47                   |
| 11 | Ethabuka (South Site) | Australia | Australia    | Desert grassland   | -23.64   | 138.4     | 104           | 211                       | Experimental  | 30           | 2013              | 6                     | 0                    |
| 12 | Kinypanial            | Australia | Australia    | Semiarid grassland | -36.2    | 143.75    | 90            | 426                       | Experimental  | 30           | 2007              | 69                    | 29                   |
| 13 | Mitchell grassland    | Australia | Australia    | Semiarid grassland | -22.48   | 143.32    | 242           | 425                       | Observational | 10           | 2013              | 17                    | 0                    |
| 14 | Mt. Caroline          | Australia | Australia    | Savanna            | -31.78   | 117.61    | 285           | 330                       | Experimental  | 40           | 2008              | 47                    | 28                   |
| 15 | Pinjarra Hills        | Australia | Australia    | Pasture            | -27.53   | 152.92    | 38            | 1133                      | Experimental  | 30           | 2013              | 28                    | 57                   |
| 16 | Fruebuel              | Europe    | Switzerland  | Pasture            | 47.11    | 8.54      | 995           | 1355                      | Experimental  | 30           | 2008              | 27                    | 11                   |
| 17 | Val Mustair           | Europe    | Switzerland  | Alpine grassland   | 46.63    | 10.37     | 2320          | 1098                      | Experimental  | 30           | 2008              | 84                    | 0                    |
| 18 | Papenburg             | Europe    | Germany      | Old field          | 53.09    | 7.47      | 0.5           | 783                       | Experimental  | 10           | 2007              | 7                     | 0                    |

|    |                                            |               |                |                      |       |         |       |      |               |    |      |    |    |
|----|--------------------------------------------|---------------|----------------|----------------------|-------|---------|-------|------|---------------|----|------|----|----|
| 19 | Elva                                       | Europe        | Estonia        | Semiarid grassland   | 58.26 | 26.35   | 63.5  | 616  | Observational | 10 | 2012 | 51 | 0  |
| 20 | Kirikukyla                                 | Europe        | Estonia        | Calcareous grassland | 58.71 | 23.8    | 7.5   | 601  | Observational | 30 | 2012 | 84 | 0  |
| 21 | Companhia das Lezirias                     | Europe        | Portugal       | Annual grassland     | 38    | -8      | 200   | 554  | Experimental  | 31 | 2012 | 44 | 2  |
| 22 | Heronsbrook (Silwood Park)                 | Europe        | United Kingdom | Mesic grassland      | 51.41 | -0.64   | 60    | 692  | Experimental  | 30 | 2007 | 36 | 6  |
| 23 | Lancaster                                  | Europe        | United Kingdom | Mesic grassland      | 53.99 | -2.63   | 180   | 1322 | Experimental  | 26 | 2008 | 16 | 0  |
| 24 | Rookery (Silwood Park)                     | Europe        | United Kingdom | Mesic grassland      | 51.41 | -0.64   | 60    | 706  | Experimental  | 30 | 2007 | 21 | 10 |
| 25 | Koffler Scientific Reserve at Joker's Hill | North America | Canada         | Pasture              | 44.02 | -79.54  | 301   | 815  | Experimental  | 36 | 2010 | 22 | 41 |
| 26 | Cowichan                                   | North America | Canada         | Old field            | 48.46 | -123.38 | 50    | 764  | Experimental  | 30 | 2007 | 17 | 88 |
| 27 | Hanover                                    | North America | United States  | Old field            | 43.42 | -72.14  | 271   | 1033 | Experimental  | 30 | 2007 | 36 | 58 |
| 28 | Savannah River                             | North America | United States  | Savanna              | 33.34 | -81.65  | 71    | 1194 | Experimental  | 20 | 2007 | 53 | 2  |
| 29 | Duke Forest                                | North America | United States  | Old field            | 36.01 | -79.02  | 141   | 1163 | Experimental  | 30 | 2007 | 36 | 31 |
| 30 | Barta Brothers                             | North America | United States  | Mixedgrass prairie   | 42.24 | -99.65  | 767   | 597  | Experimental  | 30 | 2007 | 42 | 2  |
| 31 | Boulder South Campus                       | North America | United States  | Shortgrass prairie   | 39.97 | -105.23 | 1633  | 425  | Experimental  | 20 | 2008 | 17 | 71 |
| 32 | Chichaqua Bottoms                          | North America | United States  | Tallgrass prairie    | 41.79 | -93.39  | 275   | 855  | Experimental  | 54 | 2009 | 58 | 14 |
| 33 | Cedar Creek LTER                           | North America | United States  | Tallgrass prairie    | 45.4  | -93.2   | 270   | 750  | Experimental  | 50 | 2007 | 59 | 20 |
| 34 | Cedar Point Biological Station             | North America | United States  | Shortgrass prairie   | 41.2  | -101.63 | 965   | 445  | Experimental  | 60 | 2007 | 49 | 8  |
| 35 | Hall's Prairie                             | North America | United States  | Tallgrass prairie    | 36.87 | -86.7   | 193.6 | 1282 | Experimental  | 30 | 2007 | 21 | 5  |
| 36 | Konza LTER                                 | North America | United States  | Tallgrass prairie    | 39.07 | -96.58  | 440   | 877  | Experimental  | 30 | 2007 | 53 | 2  |
| 37 | KonzaN1B                                   | North America | United States  | Tallgrass prairie    | 39.08 | -96.56  | 440   | 878  | Observational | 12 | 2007 | 68 | 6  |
| 38 | Saline Experimental                        | North America | United States  | Mixedgrass prairie   | 39.05 | -99.1   | 440   | 607  | Experimental  | 30 | 2008 | 61 | 11 |

| Range |                            |               |               |                    |       |         |          |      |               |    |      |     |    |
|-------|----------------------------|---------------|---------------|--------------------|-------|---------|----------|------|---------------|----|------|-----|----|
| 39    | Sevilleta LTER             | North America | United States | Desert grassland   | 34.36 | -106.69 | 1600     | 252  | Experimental  | 40 | 2007 | 37  | 0  |
| 40    | Shortgrass Steppe LTER     | North America | United States | Shortgrass prairie | 40.82 | -104.77 | 1650     | 365  | Experimental  | 41 | 2007 | 21  | 5  |
| 41    | Spindletop                 | North America | United States | Pasture            | 38.14 | -84.5   | 271.3    | 1140 | Experimental  | 30 | 2007 | 38  | 45 |
| 42    | Temple                     | North America | United States | Tallgrass prairie  | 31.04 | -97.35  | 184      | 871  | Experimental  | 26 | 2007 | 98  | 4  |
| 43    | Trelease                   | North America | United States | Tallgrass prairie  | 40.08 | -88.83  | 200      | 982  | Experimental  | 30 | 2008 | 19  | 16 |
| 44    | Tyson                      | North America | United States | Old field          | 38.52 | -90.56  | 169      | 997  | Experimental  | 40 | 2007 | 60  | 10 |
| 45    | Bunchgrass (Andrews LTER)  | North America | United States | Montane grassland  | 44.28 | -121.97 | 1318.083 | 1647 | Experimental  | 30 | 2007 | 48  | 6  |
| 46    | Buttercup (Andrews LTER)   | North America | United States | Montane grassland  | 44.28 | -121.96 | 1500     | 1718 | Observational | 30 | 2007 | 66  | 8  |
| 47    | Hart Mountain              | North America | United States | Shrub steppe       | 42.72 | -119.5  | 1508     | 272  | Experimental  | 30 | 2007 | 49  | 8  |
| 48    | Lookout (Andrews LTER)     | North America | United States | Montane grassland  | 44.21 | -122.13 | 1500.492 | 1898 | Experimental  | 30 | 2007 | 38  | 5  |
| 49    | Niwot Ridge LTER           | North America | United States | Alpine grassland   | 39.99 | -105.38 | 3050     | 439  | Observational | 40 | 2007 | 43  | 0  |
| 50    | Sagehen Creek UCNRS        | North America | United States | Montane grassland  | 39.43 | -120.24 | 1920     | 882  | Experimental  | 30 | 2007 | 46  | 0  |
| 51    | Sheep Experimental Station | North America | United States | Shrub steppe       | 44.24 | -112.2  | 910      | 262  | Experimental  | 40 | 2007 | 83  | 16 |
| 52    | American Camp              | North America | United States | Mesic grassland    | 48.47 | -123.01 | 41       | 557  | Observational | 30 | 2007 | 26  | 73 |
| 53    | Elliott Chaparral          | North America | United States | Annual grassland   | 32.88 | -117.05 | 200      | 331  | Experimental  | 30 | 2008 | 43  | 47 |
| 54    | Finley NWR                 | North America | United States | Mesic grassland    | 44.41 | -123.28 | 68       | 1104 | Observational | 19 | 2007 | 64  | 45 |
| 55    | Glacial Heritage           | North America | United States | Mesic grassland    | 46.87 | -123.03 | 33       | 1311 | Observational | 30 | 2007 | 17  | 65 |
| 56    | Hastings UCNRS             | North America | United States | Annual grassland   | 36.2  | -121.55 | 750      | 702  | Observational | 30 | 2007 | 32  | 41 |
| 57    | Hopland REC                | North America | United States | Annual grassland   | 39.01 | -123.06 | 598.302  | 1127 | Experimental  | 30 | 2007 | 114 | 40 |
| 58    | Jasper Ridge               | North America | United States | Annual             | 37.41 | -122.24 | 120      | 592  | Observational | 30 | 2007 | 34  | 74 |

|    |                        |               |               |                  |        |         |         |      |               |    |      |    |    |
|----|------------------------|---------------|---------------|------------------|--------|---------|---------|------|---------------|----|------|----|----|
|    | Biological Preserve    | America       | States        | grassland        |        |         |         |      |               |    |      |    |    |
| 59 | Leadbetter Point       | North America | United States | Salt marsh       | 46.61  | -124.05 | 2       | 2072 | Observational | 30 | 2007 | 13 | 0  |
| 60 | Mclaughlin UCNRS       | North America | United States | Annual grassland | 38.86  | -122.41 | 641.801 | 867  | Experimental  | 30 | 2007 | 62 | 42 |
| 61 | Sedgwick Reserve UCNRS | North America | United States | Annual grassland | 34.7   | -120.02 | 550     | 521  | Experimental  | 30 | 2007 | 41 | 41 |
| 62 | Sierra Foothills REC   | North America | United States | Annual grassland | 39.24  | -121.28 | 197.195 | 935  | Experimental  | 50 | 2007 | 96 | 42 |
| 63 | Smith Prairie          | North America | United States | Mesic grassland  | 48.21  | -122.62 | 62      | 597  | Experimental  | 30 | 2007 | 53 | 81 |
| 64 | Mar Chiquita           | South America | Argentina     | Grassland        | -37.72 | -57.42  | 6       | 838  | Experimental  | 30 | 2011 | 38 | 16 |

**Supplementary Table 2.** Percent of native and exotic species in various lifespan and functional grouping.  $\chi^2$  test for differences in lifespan by provenance and functional group by provenance distributions is based on 276 exotic and 1366 native species for which we had data on lifespan and functional group classifications. Forbs are herbaceous dicots, Graminoids are species in the Poales excluding the Poaceae, Grasses are members of Poaceae, and Woody Plants can be from any family.

|        | <b>Lifespan</b> |                 |                      |                  |
|--------|-----------------|-----------------|----------------------|------------------|
|        | <b>Annual</b>   | <b>Biennial</b> | <b>Indeterminate</b> | <b>Perennial</b> |
| Exotic | 56              | 9               | 3                    | 33               |
| Native | 21              | 3               | 3                    | 74               |

$\chi^2 = 191.17, p < 0.001$

|        | <b>Functional Group</b> |                   |                |                     |
|--------|-------------------------|-------------------|----------------|---------------------|
|        | <b>Forbs</b>            | <b>Graminoids</b> | <b>Grasses</b> | <b>Woody Plants</b> |
| Exotic | 67                      | 0                 | 31             | 2                   |
| Native | 72                      | 4                 | 19             | 5                   |

$\chi^2 = 29.59, p < 0.001$

**Supplementary Table 3.** Reduced mixed-effects regression models examining the change in native and exotic richness and cover on a factorial combination of fertilization and fencing (Consumer by Nutrient Experiment). Relative exotic richness and cover are normalized by dividing by the total richness and cover respectively and multiplying by 100. Site, block, plot, and years of treatment application are included as random effects in each regression model. Slopes that are significantly different from zero are indicated as follows: \*\*\* ( $p \leq 0.001$ ), \*\* ( $p \leq 0.01$ ), and \* ( $p \leq 0.05$ ).

| <b>Response</b>          | <b>Treatments</b> | <b>Estimate</b> | <b>SE</b> | <b>DF</b> | <b>t</b> | <b>p</b> |     |
|--------------------------|-------------------|-----------------|-----------|-----------|----------|----------|-----|
| Native Richness          | Intercept         | -0.105          | 0.106     | 722       | -0.996   | 0.320    |     |
|                          | Nutrient Addition | -0.493          | 0.077     | 302       | -6.437   | 0.000    | *** |
| Exotic Richness          | Intercept         | -0.075          | 0.069     | 722       | -1.092   | 0.275    |     |
| Relative Exotic Richness | Intercept         | 0.027           | 0.392     | 722       | 0.069    | 0.945    |     |
|                          | Nutrient Addition | 1.684           | 0.350     | 302       | 4.806    | 0.000    | *** |
| Native Cover             | Intercept         | 3.230           | 1.686     | 722       | 1.916    | 0.056    |     |
|                          | Fencing           | 1.695           | 0.845     | 302       | 2.005    | 0.046    | *   |
| Exotic Cover             | Intercept         | -1.242          | 1.868     | 722       | -0.665   | 0.506    |     |
|                          | Nutrient Addition | 3.574           | 0.735     | 302       | 4.859    | 0.000    | *** |
| Relative Exotic Cover    | Intercept         | -0.765          | 0.896     | 722       | -0.854   | 0.393    |     |
|                          | Nutrient Addition | 2.243           | 0.534     | 302       | 4.196    | 0.000    | *** |

**Supplementary Table 4.** Reduced mixed-effects regression models examining the change in exotic richness and cover on a factorial combination phosphorus (P), nitrogen (N), and potassium with micronutrients (K)(Multiple Nutrient Experiment). Relative exotic richness and cover are normalized by dividing by the total richness and cover respectively and multiplying by 100. Site, block, plot, and years of treatment application are included as nested random effects in each regression model. Slopes that are significantly different from zero are indicated as follows: \*\*\* ( $p \leq 0.001$ ), \*\* ( $p \leq 0.01$ ), and \* ( $p \leq 0.05$ ).

| <b>Response</b>          | <b>Treatments</b> | <b>Estimate</b> | <b>SE</b> | <b>DF</b> | <b>t</b> | <b>p</b> |     |
|--------------------------|-------------------|-----------------|-----------|-----------|----------|----------|-----|
| Native Richness          | Intercept         | -0.216937       | 0.131     | 1621.000  | -2       | 0.099    |     |
|                          | N addition        | -0.2147578      | 0.046     | 803.000   | -5       | 0.000    | *** |
|                          | P addition        | -0.1345677      | 0.046     | 803.000   | -3       | 0.003    | **  |
| Exotic Richness          | Intercept         | -0.06725609     | 0.058     | 1621.000  | -1       | 0.250    |     |
|                          | N addition        | 0.10274036      | 0.040     | 802.000   | 3        | 0.011    | *   |
|                          | P addition        | 0.0598623       | 0.040     | 802.000   | 1        | 0.138    |     |
|                          | N*P               | -0.12849762     | 0.057     | 802.000   | -2       | 0.025    | *   |
| Relative Exotic Richness | Intercept         | 0.3769764       | 0.348     | 1621.000  | 1        | 0.278    |     |
|                          | N addition        | 0.475043        | 0.316     | 802.000   | 2        | 0.133    |     |
|                          | P addition        | -0.2652935      | 0.315     | 802.000   | -1       | 0.400    |     |
|                          | N*K               | 1.0197065       | 0.447     | 802.000   | 2        | 0.023    | *   |
| Native Cover             | Intercept         | 2.442504        | 1.881     | 1621.000  | 1        | 0.194    |     |
|                          | P addition        | -1.204296       | 0.570     | 804.000   | -2       | 0.035    | *   |
| Exotic Cover             | Intercept         | -1.773171       | 1.357     | 1621.000  | -1       | 0.192    |     |
|                          | N addition        | 3.490205        | 0.557     | 803.000   | 6        | 0.000    | *** |
|                          | P addition        | 2.027408        | 0.557     | 803.000   | 4        | 0.000    | *** |
| Relative Exotic Cover    | Intercept         | -0.8015939      | 0.750     | 1621.000  | -1       | 0.286    |     |
|                          | N addition        | 1.76112         | 0.313     | 803.000   | 6        | 0.000    | *** |
|                          | P addition        | 0.9552652       | 0.313     | 803.000   | 3        | 0.002    | **  |



**Supplementary Table 5.** Full mixed-effects regression models examining the change in native and exotic richness and cover on a factorial combination of fertilization and fencing (Consumer by Nutrient Experiment). Relative exotic richness and cover are normalized by dividing by the total richness and cover respectively and multiplying by 100. Site, block, plot, and years of treatment application are included as random effects in each regression model. Slopes that are significantly different from zero are indicated as follows: \*\*\* ( $p \leq 0.001$ ), \*\* ( $p \leq 0.01$ ), and \* ( $p \leq 0.05$ ).

| <b>Response</b>          | <b>Treatments</b>         | <b>Estimate</b> | <b>SE</b> | <b>DF</b> | <b>t</b> | <b>p</b> |     |
|--------------------------|---------------------------|-----------------|-----------|-----------|----------|----------|-----|
| Native Richness          | Intercept                 | -0.066          | 0.118     | 722       | -0.562   | 0.574    |     |
|                          | Fencing                   | -0.080          | 0.108     | 300       | -0.734   | 0.464    |     |
|                          | Nutrient Addition         | -0.525          | 0.108     | 300       | -4.875   | 0.000    | *** |
|                          | Fencing*Nutrient Addition | 0.066           | 0.154     | 300       | 0.428    | 0.669    |     |
| Exotic Richness          | Intercept                 | -0.031          | 0.078     | 722       | -0.402   | 0.688    |     |
|                          | Fencing                   | -0.013          | 0.061     | 300       | -0.211   | 0.833    |     |
|                          | Nutrient Addition         | -0.055          | 0.061     | 300       | -0.911   | 0.363    |     |
|                          | Fencing*Nutrient Addition | -0.040          | 0.086     | 300       | -0.462   | 0.644    |     |
| Relative Exotic Richness | Intercept                 | 0.163           | 0.461     | 722       | 0.354    | 0.723    |     |
|                          | Fencing                   | -0.280          | 0.495     | 300       | -0.566   | 0.572    |     |
|                          | Nutrient Addition         | 1.449           | 0.493     | 300       | 2.941    | 0.004    | **  |
|                          | Fencing*Nutrient Addition | 0.478           | 0.702     | 300       | 0.681    | 0.496    |     |
| Native Cover             | Intercept                 | 3.919           | 1.783     | 722       | 2.198    | 0.028    | *   |
|                          | Fencing                   | 1.320           | 1.191     | 300       | 1.108    | 0.269    |     |
|                          | Nutrient Addition         | -1.403          | 1.184     | 300       | -1.184   | 0.237    |     |
|                          | Fencing*Nutrient Addition | 0.775           | 1.687     | 300       | 0.459    | 0.646    |     |
| Exotic Cover             | Intercept                 | -1.525          | 1.937     | 722       | -0.787   | 0.432    |     |
|                          | Fencing                   | 0.582           | 1.040     | 300       | 0.560    | 0.576    |     |
|                          | Nutrient Addition         | 4.156           | 1.034     | 300       | 4.019    | 0.000    | *** |
|                          | Fencing*Nutrient Addition | -1.181          | 1.473     | 300       | -0.801   | 0.424    |     |
| Relative Exotic Cover    | Intercept                 | -1.004          | 0.969     | 722       | -1.037   | 0.300    |     |
|                          | Fencing                   | 0.493           | 0.755     | 300       | 0.652    | 0.515    |     |
|                          | Nutrient Addition         | 2.814           | 0.751     | 300       | 3.747    | 0.000    | *** |
|                          | Fencing*Nutrient Addition | -1.156          | 1.070     | 300       | -1.081   | 0.281    |     |

**Supplementary Table 6.** Full mixed-effects regression models examining the change in exotic richness and cover on a factorial combination phosphorus (P), nitrogen (N), potassium with micronutrients (K)(Multiple Nutrient Experiment). Relative exotic richness and cover are normalized by dividing by the total richness and cover respectively and multiplying by 100. Site, block, plot, and years of treatment application are included as nested random effects in each regression model. Slopes that are significantly different from zero are indicated as follows: \*\*\* ( $p \leq 0.001$ ), \*\* ( $p \leq 0.01$ ), and \* ( $p \leq 0.05$ ).

| Response                 | Treatments             | Estimate | SE    | DF   | t      | p     |     |
|--------------------------|------------------------|----------|-------|------|--------|-------|-----|
| Native Richness          | Intercept              | -0.193   | 0.140 | 1621 | -1.377 | 0.169 |     |
|                          | N addition             | -0.171   | 0.090 | 798  | -1.886 | 0.060 |     |
|                          | P addition             | -0.151   | 0.090 | 798  | -1.672 | 0.095 |     |
|                          | K & Micronut. Addition | -0.105   | 0.090 | 798  | -1.172 | 0.242 |     |
|                          | N*P                    | 0.012    | 0.129 | 798  | 0.094  | 0.925 |     |
|                          | N*K                    | 0.026    | 0.128 | 798  | 0.199  | 0.843 |     |
|                          | P*K                    | 0.146    | 0.128 | 798  | 1.138  | 0.256 |     |
|                          | N*P*K                  | -0.246   | 0.182 | 798  | -1.353 | 0.177 |     |
| Exotic Richness          | Intercept              | -0.047   | 0.065 | 1621 | -0.731 | 0.465 |     |
|                          | N addition             | 0.075    | 0.057 | 798  | 1.323  | 0.186 |     |
|                          | P addition             | 0.062    | 0.057 | 798  | 1.101  | 0.271 |     |
|                          | K & Micronut. Addition | -0.041   | 0.056 | 798  | -0.730 | 0.465 |     |
|                          | N*P                    | -0.095   | 0.081 | 798  | -1.174 | 0.241 |     |
|                          | N*K                    | 0.056    | 0.081 | 798  | 0.699  | 0.485 |     |
|                          | P*K                    | -0.004   | 0.081 | 798  | -0.045 | 0.965 |     |
|                          | N*P*K                  | -0.068   | 0.114 | 798  | -0.595 | 0.552 |     |
| Relative Exotic Richness | Intercept              | 0.131    | 0.408 | 1621 | 0.321  | 0.749 |     |
|                          | N addition             | 0.739    | 0.444 | 798  | 1.666  | 0.096 |     |
|                          | P addition             | 0.512    | 0.444 | 798  | 1.153  | 0.249 |     |
|                          | K & Micronut. Addition | -0.325   | 0.441 | 798  | -0.737 | 0.461 |     |
|                          | N*P                    | -0.547   | 0.632 | 798  | -0.865 | 0.387 |     |
|                          | N*K                    | 1.011    | 0.630 | 798  | 1.606  | 0.109 |     |
|                          | P*K                    | 0.101    | 0.630 | 798  | 0.160  | 0.873 |     |
|                          | N*P*K                  | 0.033    | 0.892 | 798  | 0.037  | 0.971 |     |
| Native Cover             | Intercept              | 3.327    | 1.998 | 1621 | 1.665  | 0.096 |     |
|                          | N addition             | -1.205   | 1.132 | 798  | -1.064 | 0.288 |     |
|                          | P addition             | -2.004   | 1.132 | 798  | -1.770 | 0.077 |     |
|                          | K & Micronut. Addition | -1.066   | 1.126 | 798  | -0.947 | 0.344 |     |
|                          | N*P                    | 1.443    | 1.611 | 798  | 0.896  | 0.371 |     |
|                          | N*K                    | 0.940    | 1.607 | 798  | 0.585  | 0.559 |     |
|                          | P*K                    | 2.016    | 1.607 | 798  | 1.255  | 0.210 |     |
|                          | N*P*K                  | -3.622   | 2.276 | 798  | -1.591 | 0.112 |     |
| Exotic Cover             | Intercept              | -1.925   | 1.486 | 1621 | -1.295 | 0.196 |     |
|                          | N addition             | 3.778    | 1.109 | 798  | 3.406  | 0.001 | *** |
|                          | P addition             | 2.514    | 1.110 | 798  | 2.265  | 0.024 | *   |
|                          | K & Micronut. Addition | -0.143   | 1.104 | 798  | -0.130 | 0.897 |     |
|                          | N*P                    | -1.024   | 1.579 | 798  | -0.648 | 0.517 |     |
|                          | N*K                    | 0.328    | 1.575 | 798  | 0.208  | 0.835 |     |
|                          | P*K                    | -0.064   | 1.575 | 798  | -0.041 | 0.968 |     |
|                          | N*P*K                  | 0.227    | 2.231 | 798  | 0.102  | 0.919 |     |
| Relative Exotic Cover    | Intercept              | -0.869   | 0.824 | 1621 | -1.055 | 0.292 |     |
|                          | N addition             | 1.812    | 0.624 | 798  | 2.906  | 0.004 | **  |
|                          | P addition             | 1.353    | 0.624 | 798  | 2.168  | 0.030 | *   |

|                        |        |       |     |        |       |
|------------------------|--------|-------|-----|--------|-------|
| K & Micronut. Addition | 0.071  | 0.621 | 798 | 0.115  | 0.909 |
| N*P                    | -0.600 | 0.888 | 798 | -0.676 | 0.499 |
| N*K                    | 0.029  | 0.886 | 798 | 0.033  | 0.974 |
| P*K                    | -0.656 | 0.886 | 798 | -0.741 | 0.459 |
| N*P*K                  | 0.922  | 1.255 | 798 | 0.735  | 0.463 |

**Supplementary Table 7.** Contributions of authors in the following categories: Coordinated Network (e.g. designed experiments, coordinated network data collection and compilation, and garnered funding), Developed and framed research (contributed substantially to framing questions for this specific study), Collected Data, Analyzed data (e.g. generated statistical or mathematical models, figures, tables, maps, diagrams), Contributed to data analyses (e.g. provided comments and suggestions on analyses), Wrote the paper (e.g. wrote the majority of at least one section of the paper), Contributed to paper writing (e.g. provided comments and suggestions on manuscript).

| Name                 | Coordinated Network | Developed and framed research | Collected Data | Analyzed data | Contributed to data analyses | Wrote paper | Contributed to paper writing | Site-specific Acknowledgments |
|----------------------|---------------------|-------------------------------|----------------|---------------|------------------------------|-------------|------------------------------|-------------------------------|
| Seabloom, Eric       | X                   | X                             | X              | X             | X                            | X           | X                            |                               |
| Borer, Elizabeth     | X                   | X                             | X              |               | X                            |             | X                            |                               |
| Buckley, Yvonne      |                     |                               | X              | X             | X                            |             | X                            |                               |
| Cleland, Elsa E.     |                     |                               | X              |               | X                            |             | X                            |                               |
| Davies, Kendi        |                     |                               | X              |               | X                            |             | X                            |                               |
| Firn, Jennifer       |                     |                               | X              |               | X                            |             | X                            |                               |
| Harpole, W. Stanley  | X                   |                               | X              |               | X                            |             | X                            |                               |
| Hautier, Yann        |                     |                               | X              |               | X                            |             | X                            |                               |
| Lind, Eric           | X                   |                               | X              | X             | X                            |             | X                            |                               |
| MacDougall, Andrew   |                     |                               | X              |               | X                            |             | X                            |                               |
| Orrock, John L.      |                     |                               | X              |               | X                            |             | X                            |                               |
| Prober, Suzanne M    |                     |                               | X              |               | X                            |             | X                            |                               |
| Adler, Peter         |                     |                               | X              |               |                              |             | X                            |                               |
| Anderson, T. Michael |                     |                               | X              |               |                              |             |                              |                               |
| Bakker, Jonathan D.  |                     |                               | X              |               |                              |             | X                            |                               |
| Biederman, Lori A.   |                     |                               | X              |               |                              |             |                              |                               |
| Blumenthal, Dana M.  |                     |                               | X              |               |                              |             | X                            |                               |
| Brown, Cynthia S.    |                     |                               | X              |               |                              |             | X                            |                               |
| Brudvig, Lars        |                     |                               | X              |               |                              |             | X                            |                               |
| Cadotte, Marc        |                     |                               | X              |               |                              |             |                              |                               |
| Chu, Chengjin        |                     |                               | X              |               |                              |             |                              |                               |

Fundamental Research Funds for the Central Universities (Izujbky-2013-k15) and the Program for New Century Excellent Talents in University (NCET-12-0248)

|                        |   |   |   |   |
|------------------------|---|---|---|---|
| Cottingham, Kathryn L. |   | X |   |   |
| Crawley, Michael J.    |   | X | X |   |
| Damschen, Ellen I.     |   | X |   |   |
| Dantonio, Carla M      |   | X |   | X |
| DeCrappeo, Nicole M.   |   | X |   |   |
| Du, Guozhen            |   | X |   |   |
| Fay, Philip A          |   | X |   | X |
| Frater, Paul           |   | X |   | X |
| Gruner, Daniel S.      |   | X |   | X |
| Hagenah, Nicole        |   | X |   | X |
| Hector, Andy           |   | X |   | X |
| Hillebrand, Helmut     |   | X |   |   |
| Hofmockel, Kirsten S.  |   | X |   | X |
| Humphries, Hope C.     |   | X |   |   |
| Jin, Virginia L.       |   | X |   | X |
| Kay, Adam              |   | X |   | X |
| Kirkman, Kevin P       |   | X |   | X |
| Klein, Julia A.        |   | X |   |   |
| Knops, Johannes M. H.  |   | X |   | X |
| La Pierre, Kimberly J. |   | X |   | X |
| Ladwig, Laura          |   | X |   |   |
| Lambrinos, John G.     |   | X |   |   |
| Li, Qi                 |   | X |   |   |
| Li, Wei                |   | X |   |   |
| Marushia, Robin        |   | X |   | X |
| McCulley, Rebecca L.   |   | X |   | X |
| Melbourne, Brett       |   | X |   |   |
| Mitchell, Charles      |   | X |   | X |
| Moore, Joslin L.       |   | X |   | X |
| Morgan, John           |   | X |   | X |
| Mortensen, Brent       |   | X |   | X |
| O'Halloran, Lydia R.   | X | X |   |   |

Jim A. Nelson and A.E. Carlisle and the  
Kentucky Agricultural Experiment Station

|                         |   |   |           |
|-------------------------|---|---|-----------|
| Pyke, David             | X |   |           |
| Risch, Anita C.         | X | X |           |
| Sankaran, Mahesh        | X |   |           |
| Schuetz, Martin         | X | X |           |
| Simonsen, Anna          | X |   |           |
| Smith, Melinda          | X |   |           |
| Stevens, Carly J.       | X | X | R. Rhodes |
| Sullivan, Lauren        | X | X |           |
| Wolkovich, Elizabeth M. | X | X |           |
| Wragg, Peter D.         | X | X |           |
| Wright, Justin          | X |   |           |
| Yang, Louie             | X | X |           |
